# Supplementary material
Source: PubMed Central journal article supplement (PMC3422006)
Supplement: MCB.00070-12_zmb999109617so1.pdf [file MCB.00070-12_zmb999109617so1.pdf]

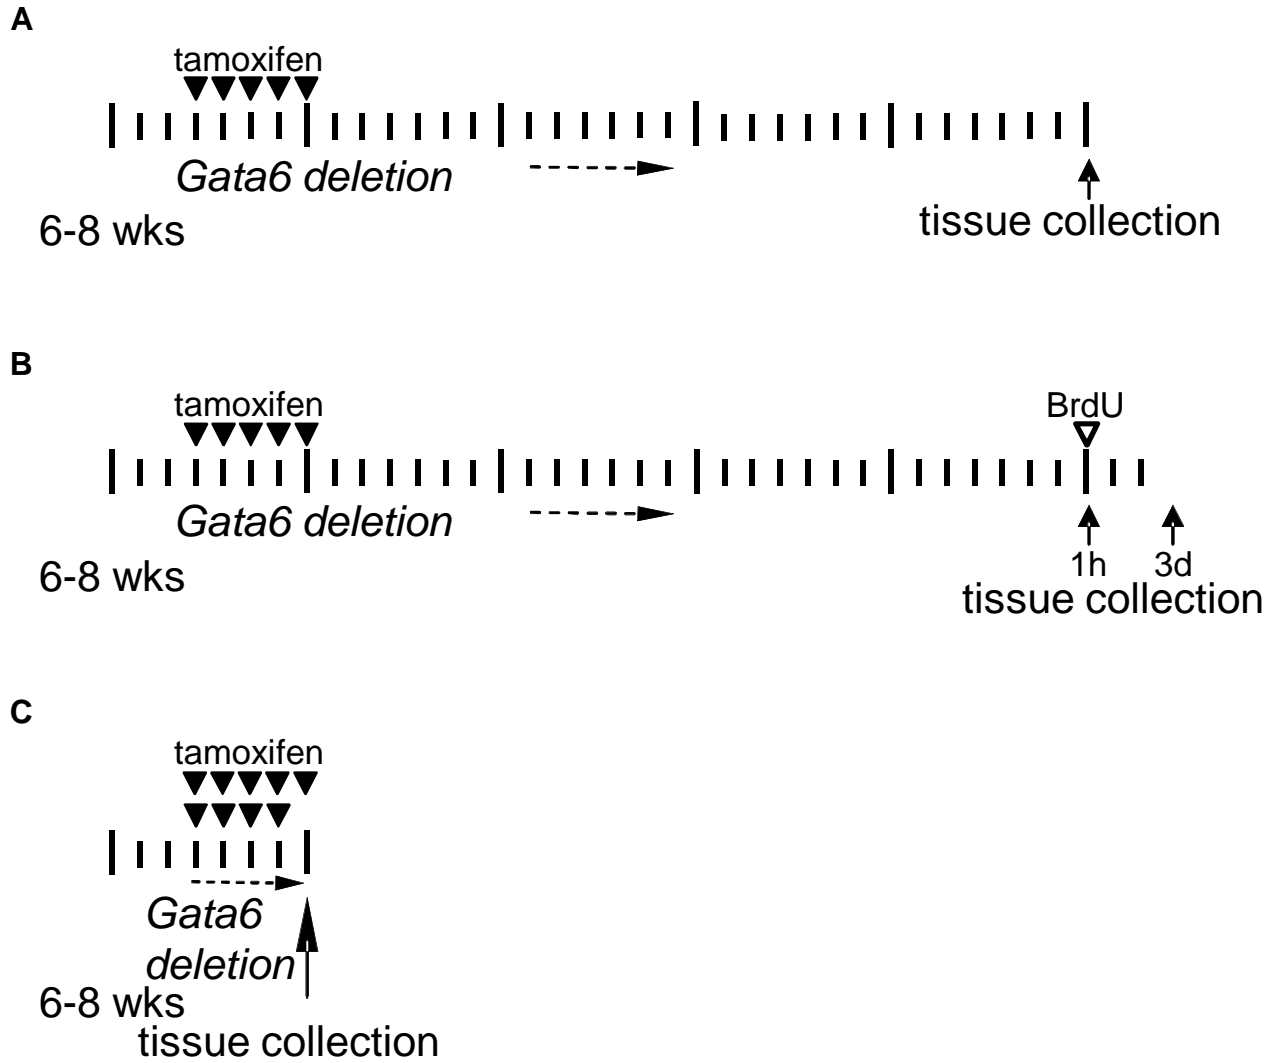

SUPPL.FIG. 1. Schematic representation of treatment plans. (A) Adult mice were treated with a daily dose of tamoxifen for 5 days and tissue was collected 27 days after the last injection. (B) Adult mice were treated with a daily dose of tamoxifen for 5 days. Twenty-seven days after the last tamoxifen injection, mice were treated with BrdU and tissue was collected 1 hour or 3 days after the BrdU injection. (C) Adult mice were treated with 2 daily doses of tamoxifen for 5 days (one dose on day 5) and tissue was collected on the day of the last tamoxifen injection.

**Mouse Real Time RT-PCR Primers**

|                |                                                                                       |
|----------------|---------------------------------------------------------------------------------------|
| <i>Gapdh:</i>  | <i>F: 5'-GCCTTCCGTGTTCTACCC-3'</i><br><i>R: 5'-TGCCTGCTTCACCACCTTC-3'</i>             |
| <i>Gata6:</i>  | <i>F: 5'-CGAGGAATCAAAAGTCAGG-3'</i><br><i>R: 5'-AGTCAAGGCCATCCACTGTC-3'</i>           |
| <i>Gata4:</i>  | <i>F: 5'-TTTGAGCGAGTTGGG-3'</i><br><i>R: 5'-GAATGCGGGTGTGC-3'</i>                     |
| <i>Gata5:</i>  | <i>F: 5'-CAACCTACCCAGCATAC-3'</i><br><i>R: 5'-CTCCTCCAAGAAGTCAG-3'</i>                |
| <i>Klf4:</i>   | <i>F: 5'-TCGGTCATCAGTGTTAG-3'</i><br><i>R: 5'-TCGGTCATCAGTGTTAG-3'</i>                |
| <i>Muc2:</i>   | <i>F: 5'-AACTACCACTGTGATGCCAATG-3'</i><br><i>R: 5'-ACAATGTTGATGCCAGACTCG-3'</i>       |
| <i>Tff3:</i>   | <i>F: 5'-AGTGGTCCTGAAGC-3'</i><br><i>R: 5'-CGATGTGACAGAGG-3'</i>                      |
| <i>Agr2:</i>   | <i>F: 5'-TGTCCCCAGAATTGTGTTTGTAGA-3'</i><br><i>R: 5'-TGTCAGAAGGTTTCATAAGCGTAGA-3'</i> |
| <i>Spink4:</i> | <i>F: 5'-TGCAGTCACATAGCTCACAAG-3'</i><br><i>R: 5'-CCATGCCAAGGAGGGGAA-3'</i>           |
| <i>ChgA:</i>   | <i>F: 5'-CACAGCCACCAATACC-3'</i><br><i>R: 5'-TCTTCCTCCTCCTCTTC-3'</i>                 |
| <i>Sct:</i>    | <i>F: 5'-CTGCTGTTGCTGCTGCTG-3'</i><br><i>R: 5'-CATTCCGTCTGAGTGTCTTGG-3'</i>           |
| <i>Cck:</i>    | <i>F: 5'-AGGAAACAACCACACATACG-3'</i><br><i>R: 5'-AGCATAGCAACATTAGGTCTG-3'</i>         |
| <i>Gcg:</i>    | <i>F: 5'-TCTGACGAGATGAGCACCATTCTG-3'</i><br><i>R: 5'-TCTGACGAGATGAGCACCATTCTG-3'</i>  |
| <i>Pyy:</i>    | <i>F: 5'-CGACAGCGACAGCGAGAAC-3'</i><br><i>R: 5'-AGGGACAGGGAAATGAACACAC-3'</i>         |
| <i>Slc4a1:</i> | <i>F: 5'-ATTCATTATTCATTCATTCATTC-3'</i><br><i>R: 5'-GCAGGCTTAGGTATTGGC-3'</i>         |
| <i>Slc4a2:</i> | <i>F: 5'-CGAGCAAGAGGAAGATGAAC-3'</i><br><i>R: 5'-GGTGGATAGCGGATGATGG-3'</i>           |
| <i>Atp1b1:</i> | <i>F: 5'-ACCTACACTTAATCTCTATGC-3'</i><br><i>R: 5'-GAACACTGCTCACTACAA-3'</i>           |
| <i>Atp1b3:</i> | <i>F: 5'-TCCGTATGCTCCAGACTG-3'</i><br><i>R: 3'-GAAGACTTGATTCCAACACTCA-3'</i>          |
| <i>Slc2a1:</i> | <i>F: 5'-TATCTCCACACTGTAGTC-3'</i><br><i>R: 5'-CAGAGTTCGGTATTAGTG-3'</i>              |
| <i>Car2:</i>   | <i>F: 5'-TTCAGTGAACACCAAATATG-3'</i><br><i>R: 5'-TTCAGTGAACACCAAATATG-3'</i>          |
| <i>Car1:</i>   | <i>F: 5'-GACAGTAGCAACCAATC-3'</i><br><i>R: 5'-TTCATCAAAACGCCAAG-3'</i>                |
| <i>Slc9a2:</i> | <i>F: 5'-AGGAAAGTCGGTTGCC-3'</i><br><i>R: 5'-GTCTACGGTCTGGATGG-3'</i>                 |
| <i>Slc9a3:</i> | <i>F: 5'-TGGCGTGGATTGTGTGAAAG-3'</i><br><i>R: 5'-CAGCAGGAAGGCCAAGATAAC-3'</i>         |

## Human Real Time RT-PCR Primers

|                |                                                                                 |
|----------------|---------------------------------------------------------------------------------|
| <i>Gapdh:</i>  | <i>F: 5'-AAGTATGACAACAGCCTC-3'</i><br><i>R: 5'-ATGAGTCCTTCCACGATA-3'</i>        |
| <i>Gata6:</i>  | <i>F: 5'-GACTTGCTCTGGTAATAG-3'</i><br><i>R: 5'-CTGTAGGTTGTGTTGTGG-3'</i>        |
| <i>Klf4:</i>   | <i>F: 5'-GCCGCTCCATTACCAAGA-3'</i><br><i>R: 5'-GATCGTCTTCCCCTCTTTG-3'</i>       |
| <i>Muc2:</i>   | <i>F: 5'-TTTCTACTGGTGTGAGTC-3'</i><br><i>R: 5'-TTGGAGGAATAAACTGGA-3'</i>        |
| <i>Tff3:</i>   | <i>F: 5'-TCTTCGTGCCTGAGACTT-3'</i><br><i>R: 5'-CAGACTCTCCCCTGACAC-3'</i>        |
| <i>Spink4:</i> | <i>F: 5'-CCAGTGGCAGCAGGAAAGC-3'</i><br><i>R: 5'-CTGGGAACAGGTTGGAGACTCTAC-3'</i> |
| <i>Car1:</i>   | <i>F: 5'-AACCTATTAGTGTCTCCTA-3'</i><br><i>R: 5'-CTGTATGTTCTGAACCAT-3'</i>       |
| <i>Car2:</i>   | <i>F: 5'-CCCTGTCTGTTTCCTATG-3'</i><br><i>R: 5'-TTGTCCTGAGAGTCATCA-3'</i>        |
| <i>Slc9a2:</i> | <i>F: 5'-ATTGAAGATGTTTGTGGAC-3'</i><br><i>R: 5'-CTTGACTTTGGTTGGTTT-3'</i>       |
| <i>Slc9a3:</i> | <i>F: 5'-CCGATGTGGATTTCAATA-3'</i><br><i>R: 5'-CTGTAAGATAGAGGAGAGT-3'</i>       |

## ChIP Primers

|                                      |                                                                                 |
|--------------------------------------|---------------------------------------------------------------------------------|
| <i>α-amylase precursor 2b (TSS):</i> | <i>F: 5'-GGAAAATAAAGGGTTGGAGC-3'</i><br><i>R: 5'-AGTGAATCATGTCAGTATAACAA-3'</i> |
| <i>USP12:</i>                        | <i>F: 5'-TATGGCCAGTGGGAATTGAT-3'</i><br><i>R: 5'-GCCTCACCAACCCTCATAAA-3'</i>    |
| <i>Spink4 (TSS):</i>                 | <i>F: 5'-TTTTCTTTCTCTCTTTCTCTATC-3'</i><br><i>R: 5'-CCTATTTATAGTGCCGCTCT-3'</i> |
| <i>Slc9a2 enhancer (-26KB):</i>      | <i>F: 5'-GACCCCTGGCTACAACCTG-3'</i><br><i>R: 5'-AACCTCAACAAGCAAAGACTAAC-3'</i>  |

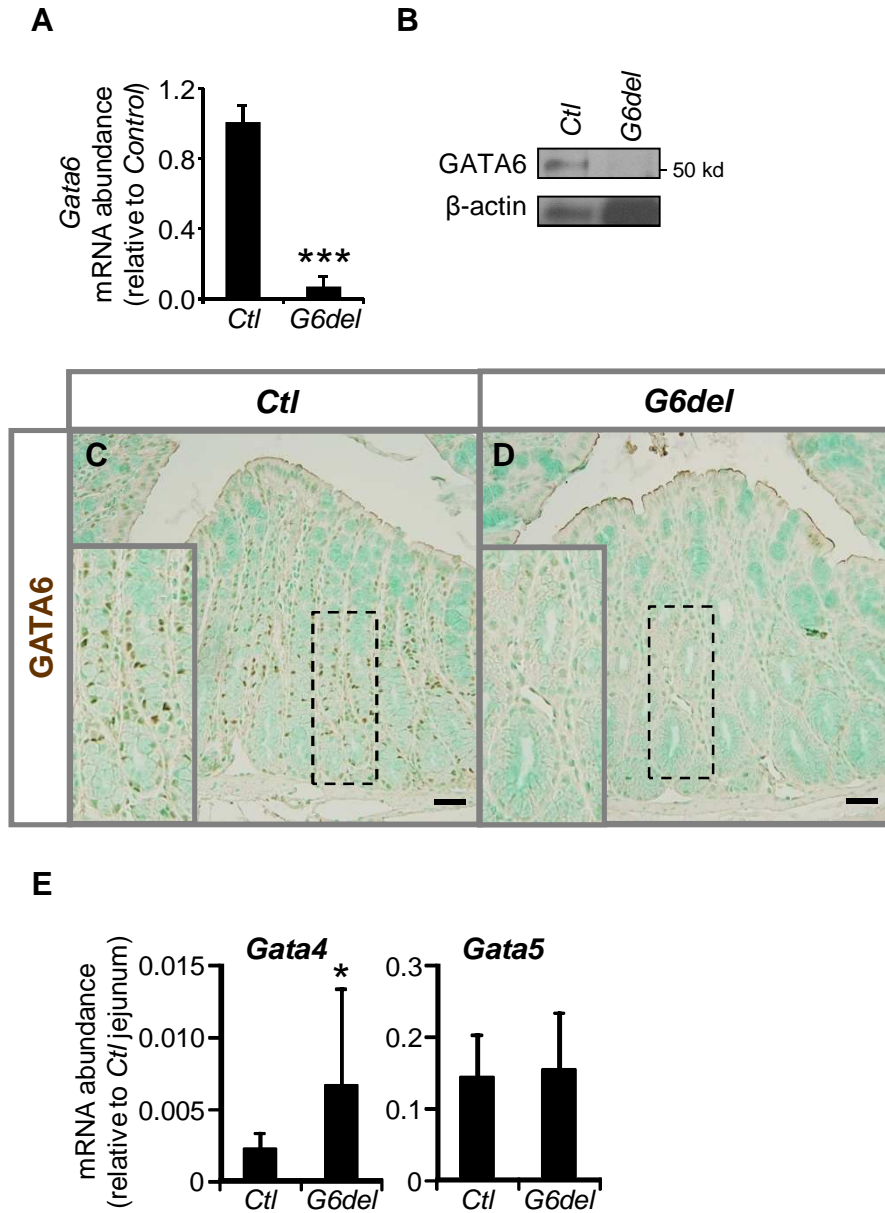

SUPPL.FIG. 4. *Gata6* is down-regulated in *G6del* colon. (A) Quantitative RT-PCR shows a >90% decrease in *Gata6* mRNA abundance in *G6del* as compared to *Ctl* colon (\*\**P*<0.001, n=7 in each group). (B to D) Western blotting (B) and immunohistochemistry (C and D) reveal that GATA6 protein is reduced in *G6del* colon. (E) Quantitative RT-PCR shows a 3-fold increase in *Gata4* mRNA abundance in *G6del* as compared to *Ctl* colon (\**P*<0.05, n=6 in each group). Bars: C and D, 100 μm.

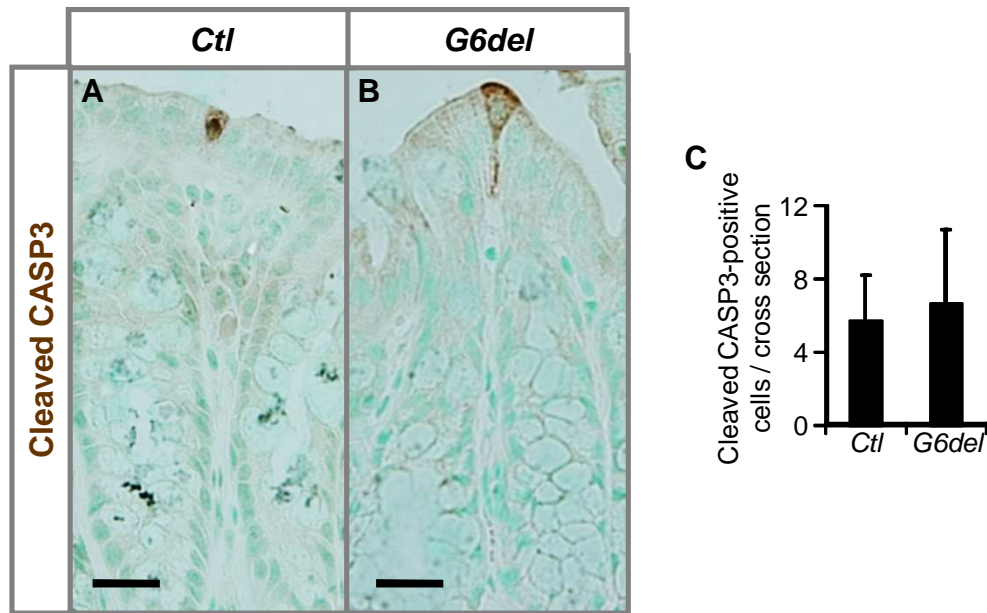

SUPPL. FIG. 5. Intestinal *Gata6* deletion does not alter apoptosis in the mature mouse colon. (A-C) Counts on cross sections of adult mouse colon immunostained with cleaved caspase 3 (CASP3) shows no difference in the number of cleaved CASP3-positive cells per cross section in *G6del* mice as compared to *Ctl*. (n=4 for *Ctl* and n=6 for *C6del*) Bars: A and B, 100  $\mu$ m.

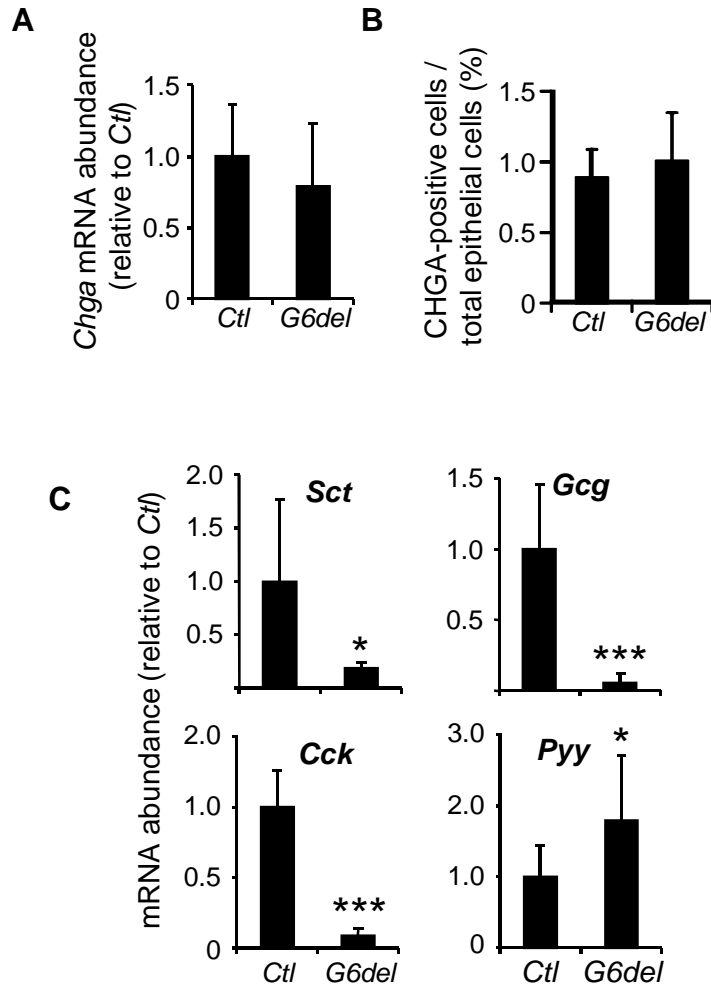

SUPPL. FIG. 6. Colonic *Gata6* deletion alters the mRNA abundance of specific enteroendocrine hormones. (A) Quantitative RT-PCR shows no difference in chromogranin A (*Chga*) mRNA abundance in *G6del* as compared to *Ctl* colon (n=7 in each group). (B) Counts on sections stained for CHGA reveal no difference in the number of CHGA-positive cells per total number of epithelial cells in *G6del* mice as compared to *Ctl*. (C) Quantitative RT-PCR shows decreases in *Sct*, *Cck* and *Gcg*, and an increase in *Pyy* mRNA abundance in *G6del* as compared to *Ctl* colon (n=7 in each group). \*P<0.05, \*\*\*P<0.001.

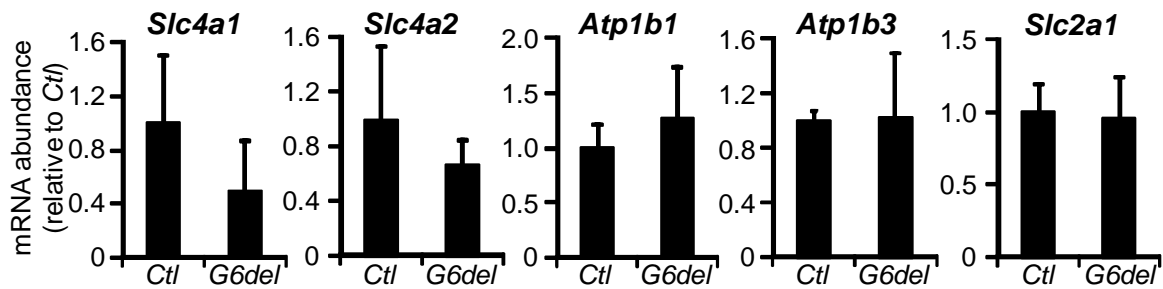

SUPPL.FIG. 7. Colonocyte genes not regulated by colonic *Gata6* deletion. Quantitative RT-PCR shows no differences in *Slc4a1*, *Slc4a2*, *Atp1b1*, *Atp1b3* and *Slc2a1* mRNA abundance in *G6del* as compared to *Ctl* colon (n=6 in each group).

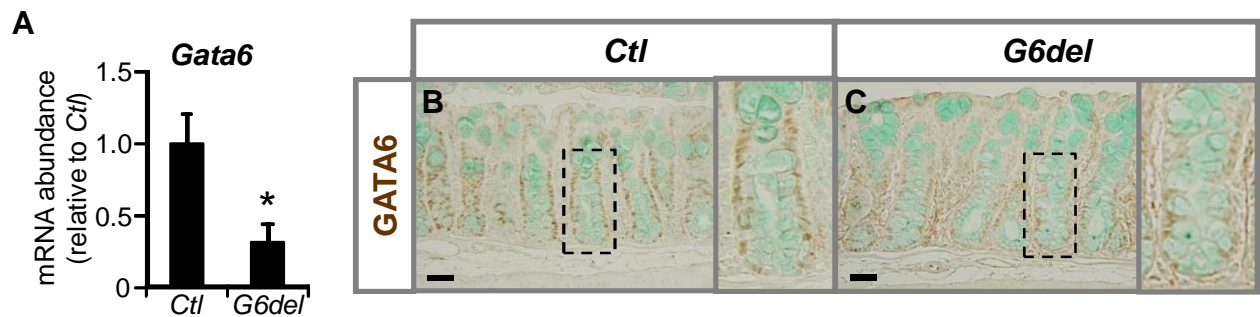

SUPPL.FIG. 8. Short-term 5-day *Gata6* deletion. (A) Quantitative RT-PCR on RNA obtained from adult mouse colon harvested 5 days after daily tamoxifen injections shows a 68% knockdown in *Gata6* mRNA abundance in *G6del* as compared to *Ctl* colon (n=3 or 4). \*P<0.05. (B and C) Immunostaining with anti-GATA6 on tissue obtained from adult mouse colon harvested 5 days after daily tamoxifen injections reveals a reduction in GATA6 protein in *G6del* as compared to *Ctl* colon. Bars: A and B, 100  $\mu$ m.
